# Supplementary material for: Fatty Acid Desaturases: Uncovering Their Involvement in Grapevine Defence against Downy Mildew
Source: MDPI journal article supplement (doi:10.3390/ijms22115473), 2021-05-22
Supplement: s1 [file s1]

**Supplementary Table S1.** General features of *Vitis vinifera* fatty acid desaturases superfamily. Proposed grapevine fatty acid desaturases nomenclature, gene locus, protein and nucleotide accessions (from NCBI), chromosome location, exon number, protein length, molecular weight (Mw), isoelectric point (pI) and subcellular prediction are represented.

| Group                                 | Sub-group                    | Proposed nomenclature | Locus        | Nucleotide     | Protein        | Chr. location | Position on chr. (Mb) | Exons | Protein length (aa) | Mw (kDa) | pI   | Subcellular location  |
|---------------------------------------|------------------------------|-----------------------|--------------|----------------|----------------|---------------|-----------------------|-------|---------------------|----------|------|-----------------------|
| Membrane-bound fatty acid desaturases | acyl-lipid Δ12/ω6 desaturase | VviFAD2-1             | LOC100252129 | XM_002279203.4 | XP_002279239.1 | 8             | 20.2                  | 2     | 382                 | 44.05    | 8.94 | Endoplasmic reticulum |
|                                       |                              | VviFAD2-2             | LOC100258789 | XM_002285604.3 | XP_002285640.1 | 6             | 1.4                   | 2     | 376                 | 43.52    | 8.83 | Endoplasmic reticulum |
|                                       | acyl-lipid Δ15/ω3 desaturase | VviFAD3-1             | LOC100243349 | XM_002277537.4 | XP_002277573.1 | 6             | 7.4                   | 9     | 386                 | 44.54    | 8.96 | Endoplasmic reticulum |
|                                       |                              | VviFAD3-2             | LOC100251798 | XM_010652591.2 | XP_010650893.1 | 6             | 7.4                   | 9     | 398                 | 45.97    | 6.89 | Endoplasmic reticulum |
|                                       | acyl-lipid Δ3 desaturase     | VviFAD4               | LOC100257229 | XM_002280947.4 | XP_002280983.1 | 19            | 6.3                   | 1     | 307                 | 34.52    | 8.52 | Chloroplast           |
|                                       | acyl-lipid Δ12/ω6 desaturase | VviFAD6               | LOC100248377 | XM_003634815.2 | XP_003634863.1 | 11            | 0.1                   | 10    | 441                 | 51.13    | 9.05 | Chloroplast           |
|                                       | acyl-lipid Δ15/ω3 desaturase | VviFAD7               | LOC100260414 | XM_002273738.3 | XP_002273774.1 | 13            | 0.6                   | 8     | 456                 | 51.55    | 8.67 | Chloroplast           |
|                                       |                              | VviFAD8               | LOC100247097 | XM_002264314.4 | XP_002264350.1 | 8             | 7.7                   | 8     | 452                 | 51.97    | 8.57 | Chloroplast           |
|                                       | sphingolipids Δ8 desaturase  | VviSLD-1              | LOC100259521 | XM_002279153.4 | XP_002279189.1 | 4             | 0.99                  | 1     | 447                 | 51.46    | 8.56 | Endoplasmic reticulum |
|                                       |                              | VviSLD-2              | LOC100265385 | XM_002279191.3 | XP_002279227.1 | 15            | 18.6                  | 1     | 447                 | 51.03    | 8.16 | Endoplasmic reticulum |
|                                       | acyl-lipid Δ9 desaturase     | VviADS                | LOC100249077 | XM_002265374.4 | XP_002265410.1 | 9             | 6.9                   | 5     | 382                 | 43.77    | 9.51 | Chloroplast           |
|                                       | sphingolipids Δ4 desaturase  | VviDES                | LOC100854247 | XM_003635372.3 | XP_003635420.1 | un            | un                    | 2     | 327                 | 37.92    | 6.39 | Endoplasmic reticulum |
| Soluble desaturases                   | acyl-ACP Δ9 desaturase       | VviSAD-1              | LOC100242444 | XM_002274672.4 | XP_002274708.2 | 5             | 24.1                  | 3     | 396                 | 45.37    | 6.14 | Chloroplast           |
|                                       |                              | VviSAD-2              | LOC100853715 | XM_003635330.3 | XP_003635378.1 | un            | un                    | 3     | 393                 | 44.99    | 7.21 | Chloroplast           |
|                                       |                              | VviSAD-3              | LOC100255873 | XM_002264759.4 | XP_002264795.1 | 18            | 13.6                  | 3     | 389                 | 44.24    | 6.16 | Chloroplast           |
|                                       |                              | VviSAD-4              | LOC100252677 | XM_002274616.3 | XP_002274652.1 | 5             | 24.1                  | 3     | 387                 | 44.63    | 6.48 | Chloroplast           |
|                                       |                              | VviSAD-5              | LOC100267952 | XM_002274047.3 | XP_002274083.1 | 5             | 23.9                  | 3     | 387                 | 44.30    | 6.48 | Chloroplast           |

**Supplementary Table S3.** Protein motifs of the *Vitis vinifera* fatty acid desaturases.

| Group                                 | Sub-group                    | Proposed nomenclature | Histidine-box 1 | Start | End | Histidine-box 2 | Start | End | Histidine-box 3 | Start | End | ER retrieval | Start | End | Cytochrome b5 | Start | End | References                                  |                                        |
|---------------------------------------|------------------------------|-----------------------|-----------------|-------|-----|-----------------|-------|-----|-----------------|-------|-----|--------------|-------|-----|---------------|-------|-----|---------------------------------------------|----------------------------------------|
| Membrane-bound fatty acid desaturases | acyl-lipid Δ12/ω6 desaturase | VviFAD2-1             | HECGH           | 105   | 109 | HRRHH           | 141   | 145 | HHITDTHVAHH     | 309   | 319 | YQNKF        | 378   | 382 |               |       |     | Okuley et al., 1994; McCartney et al., 2004 |                                        |
|                                       |                              | VviFAD2-2             | HECGH           | 98    | 102 | HRRHH           | 134   | 138 | HNITDTHVAHH     | 302   | 312 | YRNKF        | 372   | 376 |               |       |     |                                             |                                        |
|                                       | acyl-lipid Δ15/ω3 desaturase | VviFAD3-1             | HDCGH           | 103   | 107 | HRTTH           | 139   | 143 | HDIGTHVIHH      | 301   | 310 |              |       |     |               |       |     | Yadav et al., 1993                          |                                        |
|                                       |                              | VviFAD3-2             | HDCGH           | 115   | 119 | HRTTH           | 151   | 155 | HNTGTHVIHH      | 313   | 322 |              |       |     |               |       |     |                                             |                                        |
|                                       | acyl-lipid Δ3 desaturase     | VviFAD4               | QGHH            | 152   | 155 | HAWAH           | 211   | 215 | HAAHH           | 240   | 244 |              |       |     |               |       |     | Gao et al., 2009                            |                                        |
|                                       | acyl-lipid Δ12/ω6 desaturase | VviFAD6               | HDCAH           | 165   | 169 | HDRHH           | 201   | 205 | HYINVHIPHH      | 356   | 365 |              |       |     |               |       |     | Falcone et al., 1994                        |                                        |
|                                       | acyl-lipid Δ15/ω3 desaturase | VviFAD7               | HDCGH           | 175   | 179 | HRTTH           | 211   | 215 | HDIGTHVIHH      | 373   | 382 |              |       |     |               |       |     | Gibson et al., 1993                         |                                        |
|                                       |                              | VviFAD8               | HDCGH           | 171   | 175 | HRTTH           | 207   | 211 | HDIGTHVIHH      | 369   | 378 |              |       |     |               |       |     |                                             |                                        |
|                                       | sphingolipids Δ8 desaturase  | VviSLD-1              | HDSGH           | 158   | 162 | HNAHH           | 195   | 199 | HGGLQFQIEHH     | 366   | 376 |              |       |     |               | HPGG  | 40  | 43                                          | Sperling et al., 1998; Li et al., 2012 |
|                                       |                              | VviSLD-2              | HDSGH           | 158   | 162 | HNAHH           | 195   | 199 | HGGLQFQLEHH     | 366   | 376 |              |       |     |               | HPGG  | 40  | 43                                          |                                        |
|                                       | acyl-lipid Δ9 desaturase     | VviADS                | HRNLSH          | 155   | 160 | HRYHH           | 192   | 196 | AFGEGWHNNHH     | 318   | 328 |              |       |     |               |       |     |                                             | Fukuchi-Mizutani et al., 1998          |
|                                       | sphingolipids Δ4 desaturase  | VviDES                | HELSH           | 94    | 98  | HLEHH           | 131   | 135 | WSVGYHNEHH      | 257   | 266 |              |       |     |               |       |     |                                             | Ternes et al., 2002                    |
| Soluble desaturases                   | acyl-ACP Δ9 desaturase       | VviSAD-1              | ENRH            | 176   | 179 | EKRH            | 262   | 265 |                 |       |     |              |       |     |               |       |     | Shanklin and Cahoon, 1998                   |                                        |
|                                       |                              | VviSAD-2              | ENRH            | 173   | 176 | EKRH            | 259   | 262 |                 |       |     |              |       |     |               |       |     |                                             |                                        |
|                                       |                              | VviSAD-3              | ENRH            | 167   | 170 | ERRH            | 253   | 256 |                 |       |     |              |       |     |               |       |     |                                             |                                        |
|                                       |                              | VviSAD-4              | ENRH            | 167   | 170 | EKRH            | 253   | 256 |                 |       |     |              |       |     |               |       |     |                                             |                                        |
|                                       |                              | VviSAD-5              | ENRH            | 167   | 170 | EKRH            | 253   | 256 |                 |       |     |              |       |     |               |       |     |                                             |                                        |

**Supplementary Table S4.** Protein domains of the *Vitis vinifera* fatty acid desaturases.

| Group                                        | Sub-group                                  | Proposed nomenclature | Domain                                      | Start | End |
|----------------------------------------------|--------------------------------------------|-----------------------|---------------------------------------------|-------|-----|
| <b>Membrane-bound fatty acid desaturases</b> | acyl-lipid $\Delta 12/\omega 6$ desaturase | VviFAD2-1             | Fatty acid desaturase (PF00487)             | 82    | 350 |
|                                              |                                            | VviFAD2-2             | Fatty acid desaturase (PF00487)             | 71    | 343 |
|                                              |                                            | VviFAD3-1             | DUF3474 (PF11960)                           | 4     | 73  |
|                                              | acyl-lipid $\Delta 15/\omega 3$ desaturase | VviFAD3-1             | Fatty acid desaturase (PF00487)             | 79    | 339 |
|                                              |                                            | VviFAD3-2             | DUF3474 (PF11960)                           | 1     | 85  |
|                                              |                                            | VviFAD3-2             | Fatty acid desaturase (PF00487)             | 91    | 351 |
|                                              | acyl-lipid $\Delta 3$ desaturase           | VviFAD4               | TMEM189_B_dmain (PF10520)                   | 119   | 287 |
|                                              | acyl-lipid $\Delta 12/\omega 6$ desaturase | VviFAD6               | Fatty acid desaturase (PF00487)             | 141   | 397 |
|                                              |                                            | VviFAD7               | DUF3474 (PF11960)                           | 1     | 145 |
|                                              | acyl-lipid $\Delta 15/\omega 3$ desaturase | VviFAD7               | Fatty acid desaturase (PF00487)             | 150   | 411 |
|                                              |                                            | VviFAD8               | DUF3474 (PF11960)                           | 1     | 141 |
|                                              |                                            | VviFAD8               | Fatty acid desaturase (PF00487)             | 146   | 407 |
|                                              | sphingolipids $\Delta 4$ desaturase        | VviSLD1               | Cytochrome b5 (PF00173)                     | 9     | 101 |
|                                              |                                            | VviSLD1               | Fatty acid desaturase (PF00487)             | 135   | 408 |
|                                              |                                            | VviSLD2               | Cytochrome b5 (PF00173)                     | 9     | 80  |
|                                              | acyl-lipid $\Delta 9$ desaturase           | VviSLD2               | Fatty acid desaturase (PF00487)             | 134   | 408 |
|                                              |                                            | VviADS                | Fatty acid desaturase (PF00487)             | 130   | 362 |
|                                              | sphingolipids $\Delta 4$ desaturase        | VviDES                | Sphingolipid $\Delta$ -desaturase (PF08557) | 11    | 47  |
|                                              |                                            | VviDES                | Fatty acid desaturase (PF00487)             | 69    | 297 |
| <b>Soluble desaturases</b>                   | acyl-ACP $\Delta 9$ desaturase             | VviSAD-1              | Fatty acid desaturase 2 (PF03405)           | 68    | 390 |
|                                              |                                            | VviSAD-2              | Fatty acid desaturase 2 (PF03405)           | 65    | 387 |
|                                              |                                            | VviSAD-3              | Fatty acid desaturase 2 (PF03405)           | 57    | 383 |
|                                              |                                            | VviSAD-4              | Fatty acid desaturase 2 (PF03405)           | 59    | 381 |
|                                              |                                            | VviSAD-5              | Fatty acid desaturase 2 (PF03405)           | 59    | 381 |

**Supplementary Table S5.** Subcellular prediction of the *Vitis vinifera* fatty acid desaturases proteins.

| TargetP 2.0                           |                              |                       |        |                |                                |                              |                                    | Loalyzer Version 1.0.4 |                  |                       | Predotar Version 1.0.4 |         |                       |           |                  |                       |                       |
|---------------------------------------|------------------------------|-----------------------|--------|----------------|--------------------------------|------------------------------|------------------------------------|------------------------|------------------|-----------------------|------------------------|---------|-----------------------|-----------|------------------|-----------------------|-----------------------|
| Group                                 | Sub-group                    | Proposed nomenclature | Other  | Signal peptide | Mitochondiral trasnfer peptide | Chloroplast transfer peptide | Thylakoid luminal transfer peptide | Chloroplast            | Mitochondria     | Nucleus               | Mitochondrial          | Plastid | Endoplasmic Reticulum | Elsewhere | Result           | Final Prediction      |                       |
| Membrane-bound fatty acid desaturases | acyl-lipid Δ12/ω6 desaturase | VviFAD2-1             | 0.9996 | 0.0001         | 0                              | 0.0001                       | 0.0002                             | -                      | -                | -                     | 0,03                   | 0,02    | 0                     | 0,95      | none             | Endoplasmic reticulum |                       |
|                                       |                              | VviFAD2-2             | 0.9846 | 0              | 0.0003                         | 0.0109                       | 0.0041                             | Y (0.838   1-42)       | -                | -                     | 0,08                   | 0,52    | 0                     | 0,44      | plastid          | Endoplasmic reticulum |                       |
|                                       | acyl-lipid Δ15/ω3 desaturase | VviFAD3-1             | 1      | 0              | 0                              | 0                            | 0                                  | -                      | -                | -                     | 0,01                   | 0,01    | 0                     | 0,99      | none             | Endoplasmic reticulum |                       |
|                                       |                              | VviFAD3-2             | 1      | 0              | 0                              | 0                            | 0                                  | -                      | -                | -                     | 0,01                   | 0,01    | 0                     | 0,99      | none             | Endoplasmic reticulum |                       |
|                                       | acyl-lipid Δ3 desaturase     | VviFAD4               | 0.149  | 0              | 0.0179                         | 0.7856                       | 0.0474                             | -                      | -                | -                     | 0,28                   | 0,26    | 0                     | 0,53      | plastid          | Chloroplast           |                       |
|                                       | acyl-lipid Δ12/ω6 desaturase | VviFAD6               | 0.0685 | 0.0002         | 0.0137                         | 0.9009                       | 0.0167                             | Y (0.971   1-25)       | -                | Y (KRVK)              | 0,04                   | 0,57    | 0,02                  | 0,41      | plastid          | Chloroplast           |                       |
|                                       | acyl-lipid Δ15/ω3 desaturase | VviFAD7               | 0.0527 | 0.0001         | 0.0035                         | 0.9316                       | 0.0122                             | Y (0.994   1-59)       | -                | -                     | 0,09                   | 0,79    | 0,01                  | 0,19      | plastid          | Chloroplast           |                       |
|                                       |                              | VviFAD8               | 0.201  | 0              | 0.0837                         | 0.5356                       | 0.1797                             | Y (0.996   1-40)       | -                | -                     | 0,02                   | 0,86    | 0                     | 0,14      | plastid          | Chloroplast           |                       |
|                                       | sphingolipids Δ8 desaturase  | VviSLD-1              | 0.9999 | 0              | 0                              | 0                            | 0                                  | 0                      | -                | -                     | -                      | 0,01    | 0                     | 0         | 0,99             | none                  | Endoplasmic reticulum |
|                                       |                              | VviSLD-2              | 1      | 0              | 0                              | 0                            | 0                                  | 0                      | -                | -                     | -                      | 0,01    | 0                     | 0         | 0,99             | none                  | Endoplasmic reticulum |
|                                       | acyl-lipid Δ9 desaturase     | VviADS                | 0.0709 | 0              | 0.0005                         | 0.9137                       | 0.0148                             | Y (1.0   1-41)         | -                | Y (RRRK,RRRR)         | 0,05                   | 0,93    | 0,02                  | 0,07      | plastid          | Chloroplast           |                       |
|                                       | sphingolipids Δ4 desaturase  | VviDES                | 1      | 0              | 0                              | 0                            | 0                                  | 0                      | -                | -                     | -                      | 0,01    | 0                     | 0         | 0,99             | none                  | Endoplasmic reticulum |
| Soluble desaturases                   | acyl-ACP Δ9 desaturase       | VviSAD-1              | 0.013  | 0              | 0.0096                         | 0.9761                       | 0.0013                             | Y (0.828   1-42)       | Y (0.792   1-40) | Y (RKAQDYVCGLAPRFRKL) | 0,03                   | 0,33    | 0,01                  | 0,64      | possibly plastid | Chloroplast           |                       |
|                                       |                              | VviSAD-2              | 0.0724 | 0              | 0.0339                         | 0.8759                       | 0.0178                             | Y (0.999   1-26)       | -                | Y (RKAQDYVCGLAPRIRKL) | 0,28                   | 0,88    | 0                     | 0,09      | plastid          | Chloroplast           |                       |
|                                       |                              | VviSAD-3              | 0.0565 | 0              | 0.0077                         | 0.932                        | 0.0037                             | Y (1.0   1-41)         | -                | Y (RRAQDFVCGLAPRIRKL) | 0,18                   | 0,05    | 0,01                  | 0,77      | none             | Chloroplast           |                       |
|                                       |                              | VviSAD-4              | 0.0611 | 0.0104         | 0.0093                         | 0.9077                       | 0.0114                             | Y (0.998   1-51)       | -                | Y (RKAQDYVCGLAKRLRT)  | 0,09                   | 0,63    | 0,16                  | 0,28      | plastid          | Chloroplast           |                       |
|                                       |                              | VviSAD-5              | 0.0489 | 0.0574         | 0.0223                         | 0.8552                       | 0.0161                             | Y (0.999   1-51)       | -                | Y (RKAQDYVCGLAQRLRKL) | 0,07                   | 0,62    | 0,22                  | 0,28      | plastid          | Chloroplast           |                       |

**Supplementary Table S6.** Reference and target genes transcripts primer sequences, amplicon length, amplification efficiency, annealing and melting temperature are represented.

| Gene name                             | Abbreviation     | NCBI Accession Number | Primer Sequence                                           | Amplicon length (bp) | Ta (°C) | Tm (°C) | Amplification efficiency (E) | Reference          |
|---------------------------------------|------------------|-----------------------|-----------------------------------------------------------|----------------------|---------|---------|------------------------------|--------------------|
| Elongation Factor 1-alpha             | <i>EF1α</i>      | XM_002284888.3        | Fw: AACCAAAATATCCGGAGTAAAAGA<br>Rev: GAACTGGGTGCTTGATAGGC | 150                  | 60      | 80.20   | 1,95                         | Reid et al. (2006) |
| Ubiquitin-conjugating enzyme          | <i>UBQ</i>       | XM_002273532.2        | Fw: GTGGTATTATTGAGCCATCCTT<br>Rev: AACCTCCAATCCAGTCATCTAC | 182                  | 60      | 81.28   | 1,90                         | Reid et al. (2006) |
|                                       | <i>VviFAD2-1</i> | XM_002279203.4        | FW: CCCAAAACCAATCCAAACTC<br>Rev: TACTGTAGCGCCTGCCTGAA     | 139                  | 60      | 79.51   | 1,91                         |                    |
|                                       | <i>VviFAD2-2</i> | XM_002285604.3        | Fw: GTGCCAAAGCCCAATCCAG<br>Rev: ATTATAGGGGCCAGACACATT     | 138                  | 60      | 80.79   | 2,04                         |                    |
|                                       | <i>VviFAD3-1</i> | XM_002277537.4        | Fw: ATAGAAGCCCAGGGAAGAAG<br>Rev: CAAAGGATACGCAAACAAGCA    | 135                  | 60      | 80.00   | 1,96                         |                    |
|                                       | <i>VviFAD3-2</i> | XM_010652591.2        | Fw: TGGTACCGTGGCAAGGAAT<br>Rev: ATGCGTGCCAGTGTTATGTT      | Not detected         |         |         |                              |                    |
| Membrane-bound fatty acid desaturases | <i>VviFAD4</i>   | XM_002280947.4        | Fw: TG TTCAGCCAGCAGTTCCAT<br>Rev: CTCGACACTAGCAGTCCAG     | 97                   | 60      | 83.06   | 1,97                         |                    |
|                                       | <i>VviFADS</i>   | XM_002265374.4        | Fw: TGCGGTGACTGGTCTATTG<br>Rev: AACCCACAGTAGGCGAAA        | 109                  | 58      | 78.32   | 2,02                         |                    |
|                                       | <i>VviFAD6</i>   | XM_003634815.2        | Fw: CATGGTTGGGTTATCACTTCT<br>Rev: CTATCCAACGAGGGTAATCAC   | 147                  | 60      | 78.86   | 1,96                         |                    |
|                                       | <i>VviFAD7</i>   | XM_002273738.3        | Fw: TACCGCTACTAGAACATTG<br>Rev: TCCTACCCACAGATAAAG        | 72                   | 54      | 76.35   | 1,89                         |                    |
|                                       | <i>VviFAD8</i>   | XM_002264314.4        | Fw: GGCAC TTTCCCTCCTCCTT<br>Rev: GGGCCTTATGCCACATTCT      | 151                  | 58      | 79.16   | 2,04                         |                    |
|                                       | <i>VviSAD-1</i>  | XM_002274672.4        | Fw: AGGTCAGGCATACACTCTC<br>Rev: ACGAAAATGCAACTGGGAAAC     | 89                   | 58      | 77.83   | 1,94                         |                    |
| Soluble desaturases                   | <i>VviSAD-2</i>  | XM_003635330.3        | Fw: TATGTCTGTGGACTGGCTC<br>Rev: AGTTGCTTGCTTCAACCCTTC     | 72                   | 58      | 77.63   | 1,96                         |                    |

**Supplementary Table S7.** Biological process and function of the *Vitis vinifera* fatty acid desaturases proteins.

| Group                                 | Sub-group                                     | Proposed nomenclature | Biological process                                                               | Putative Function                                          |
|---------------------------------------|-----------------------------------------------|-----------------------|----------------------------------------------------------------------------------|------------------------------------------------------------|
| Membrane-bound fatty acid desaturases | acyl-lipid $\Delta$ 12/ $\omega$ 6 desaturase | VviFAD2-1             | GO:0006629 - lipid metabolic process                                             | None predicted                                             |
|                                       |                                               | VviFAD2-2             | GO:0006629 - lipid metabolic process                                             | None predicted                                             |
|                                       | acyl-lipid $\Delta$ 15/ $\omega$ 3 desaturase | VviFAD3-1             | GO:0006629 - lipid metabolic process<br>GO:0055114 - oxidation-reduction process | GO:0016717 - oxidoreductase activity                       |
|                                       |                                               | VviFAD3-2             | GO:0006629 - lipid metabolic process<br>GO:0055114 - oxidation-reduction process | GO:0016717 - oxidoreductase activity                       |
|                                       |                                               | VviFAD4               | None predicted                                                                   | None predicted                                             |
|                                       |                                               | VviFAD6               | GO:0006629 - lipid metabolic process                                             | None predicted                                             |
|                                       | acyl-lipid $\Delta$ 15/ $\omega$ 3 desaturase | VviFAD7               | GO:0006629 - lipid metabolic process<br>GO:0055114 - oxidation-reduction process | GO:0016717 - oxidoreductase activity                       |
|                                       |                                               | VviFAD8               | GO:0006629 - lipid metabolic process<br>GO:0055114 - oxidation-reduction process | GO:0016717 - oxidoreductase activity                       |
|                                       | sphingolipids $\Delta$ 8 desaturase           | VviSLD-1              | GO:0006629 - lipid metabolic process                                             | GO:0016491 - oxidoreductase activity                       |
|                                       |                                               | VviSLD-2              | GO:0006629 - lipid metabolic process                                             | GO:0016491 - oxidoreductase activity                       |
|                                       | acyl-lipid $\Delta$ 9 desaturase              | VviADS                | GO:0006629 - lipid metabolic process<br>GO:0055114 - oxidation-reduction process | GO:0016717 - oxidoreductase activity                       |
|                                       |                                               |                       | GO:0006629 - lipid metabolic process                                             | GO:0042284 sphingolipid delta-4 desaturase activity        |
|                                       | sphingolipids $\Delta$ 4 desaturase           | VviDES                | GO:0030148 - sphingolipid biosynthetic process                                   |                                                            |
|                                       |                                               |                       | GO:0006631 fatty acid metabolic process                                          | GO:0016491 oxidoreductase activity                         |
|                                       |                                               |                       | GO:0006633 fatty acid biosynthetic process                                       | GO:0045300 acyl-[acyl-carrier-protein] desaturase activity |
|                                       |                                               |                       | GO:0055114 oxidation-reduction process                                           |                                                            |
| Soluble desaturases                   | acyl-ACP $\Delta$ 9 desaturase                | VviSAD-1              | GO:0006631 fatty acid metabolic process                                          | GO:0016491 oxidoreductase activity                         |
|                                       |                                               |                       | GO:0006633 fatty acid biosynthetic process                                       | GO:0045300 acyl-[acyl-carrier-protein] desaturase activity |
|                                       |                                               |                       | GO:0055114 oxidation-reduction process                                           |                                                            |
|                                       |                                               |                       | GO:0006631 fatty acid metabolic process                                          | GO:0016491 oxidoreductase activity                         |
|                                       |                                               |                       | GO:0006633 fatty acid biosynthetic process                                       | GO:0045300 acyl-[acyl-carrier-protein] desaturase activity |
|                                       |                                               | VviSAD-2              | GO:0055114 oxidation-reduction process                                           |                                                            |
|                                       |                                               |                       | GO:0006631 fatty acid metabolic process                                          | GO:0016491 oxidoreductase activity                         |
|                                       |                                               |                       | GO:0006633 fatty acid biosynthetic process                                       | GO:0045300 acyl-[acyl-carrier-protein] desaturase activity |
|                                       |                                               |                       | GO:0055114 oxidation-reduction process                                           |                                                            |
|                                       |                                               |                       | GO:0006631 fatty acid metabolic process                                          | GO:0016491 oxidoreductase activity                         |
|                                       |                                               | VviSAD-3              | GO:0006633 fatty acid biosynthetic process                                       | GO:0045300 acyl-[acyl-carrier-protein] desaturase activity |
|                                       |                                               |                       | GO:0055114 oxidation-reduction process                                           |                                                            |
|                                       |                                               |                       | GO:0006631 fatty acid metabolic process                                          | GO:0016491 oxidoreductase activity                         |
|                                       |                                               |                       | GO:0006633 fatty acid biosynthetic process                                       | GO:0045300 acyl-[acyl-carrier-protein] desaturase activity |
|                                       |                                               |                       | GO:0055114 oxidation-reduction process                                           |                                                            |
|                                       |                                               | VviSAD-4              | GO:0006631 fatty acid metabolic process                                          | GO:0016491 oxidoreductase activity                         |
|                                       |                                               |                       | GO:0006633 fatty acid biosynthetic process                                       | GO:0045300 acyl-[acyl-carrier-protein] desaturase activity |
|                                       |                                               |                       | GO:0055114 oxidation-reduction process                                           |                                                            |
|                                       |                                               |                       | GO:0006631 fatty acid metabolic process                                          | GO:0016491 oxidoreductase activity                         |
|                                       |                                               |                       | GO:0006633 fatty acid biosynthetic process                                       | GO:0045300 acyl-[acyl-carrier-protein] desaturase activity |
|                                       |                                               | VviSAD-5              | GO:0055114 oxidation-reduction process                                           |                                                            |
|                                       |                                               |                       |                                                                                  |                                                            |
|                                       |                                               |                       |                                                                                  |                                                            |
|                                       |                                               |                       |                                                                                  |                                                            |
|                                       |                                               |                       |                                                                                  |                                                            |
